# Supplementary material for: Electronic view on ethene adsorption in Cu(i) exchanged zeolites
Source: Royal Society of Chemistry journal article supplement (doi:10.1039/b920551a), 2010-01-01
Supplement: b920551a.pdf [file b920551a.pdf]

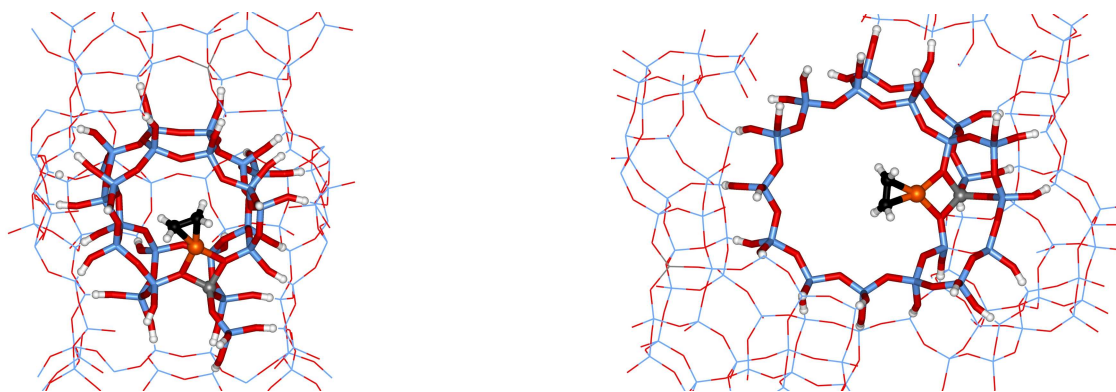

Depictions of large clusters used for the benchmark calculations, as mentioned in Section 3.3: 23T cluster for site I2 in MFI (left) and 22T cluster for site III in FAU (right).
